# Supplementary material for: Evaluating radiological response in pancreatic neuroendocrine tumours treated with sunitinib: comparison of Choi versus RECIST criteria (CRIPNET_ GETNE1504 study)
Source: PubMed Central journal article supplement (PMC6889276; doi:10.1038/s41416-019-0558-7), 2019-09-03

**Supplementary Table 1.** Definitions of RECIST/Choi criteria used in the analyses of the images of computed tomography

| <b>CRITERIA</b> | <b>RECIST 1.1</b>                                                                                                                                                                                                                             | <b>CHOI</b>                                                                                      |
|-----------------|-----------------------------------------------------------------------------------------------------------------------------------------------------------------------------------------------------------------------------------------------|--------------------------------------------------------------------------------------------------|
| <b>CR</b>       | Disappearance of all target lesions. Any pathological lymph nodes (whether target or non-target) must have reduction in short axis to <10 mm                                                                                                  | Disappearance of all target lesion(s)                                                            |
| <b>PR</b>       | Decrease $\geq 30\%$ in the sum of the diameters of target lesions taking as reference the baseline sum. No new lesion(s)                                                                                                                     | Decrease in tumor size $\geq 10\%$ or decrease in tumor density $\geq 15\%$ on CT                |
| <b>SD</b>       | Neither response nor progression. No new lesion(s)                                                                                                                                                                                            | Does not meet the criteria for CR, PR or PD                                                      |
| <b>PD</b>       | Increase $\geq 20\%$ in the sum of the diameters of target lesions taking as reference the smallest sum measured during follow-up (nadir) and $\geq 5\text{mm}$ in absolute value and/or appearance of new unequivocally metastatic lesion(s) | Increase $\geq 10\%$ in tumor size and does not meet PR criteria by tumor density<br>New lesions |

Abbreviations: RECIST= Response Evaluation Criteria In Solid Tumors, CR= complete response, PR= partial response, SD= stable disease, PD= progressive disease.

**Supplementary Table 2.** Summary of effects of 6-month tumor response assessment on PFS/OS times

|                                                            | Choi criteria     | RECIST v1.1      |
|------------------------------------------------------------|-------------------|------------------|
| 12-month landmark PFS (CI 95%)                             |                   |                  |
| PR                                                         | 73.1 (58.6-85.8)  | 90.0 (73.2-100)  |
| SD                                                         | 61.9 (38.2-99.9)  | 65.8 (53.5-80.4) |
| PD                                                         | 15.3 (6.6-29.1)   | -                |
| 24-month landmark PFS (CI 95%)                             |                   |                  |
| PR                                                         | 40.4 (28.4-57.5)  | 48.0 (24.5-93.8) |
| SD                                                         | 33.0 (11.8-92.6)  | 33.7 (23.3-50.2) |
| PD                                                         | 8.1 (3.3-18.2)    | -                |
| 12-month landmark OS (CI 95%)                              |                   |                  |
| PR                                                         | 100 (NA)          | 100 (NA)         |
| SD                                                         | 100 (NA)          | 94.8 (85.9-99.3) |
| PD                                                         | 66.3 (51.3-81.7)  | 67.2 (50.4-83.4) |
| 24-month landmark OS (CI 95%)                              |                   |                  |
| PR                                                         | 91.8 (83.3-100.0) | 100 (NA)         |
| SD                                                         | 75.0 (54.1-100.0) | 81.7 (69.6-91.1) |
| PD                                                         | 50.1 (33.7-67.5)  | 48.1 (32.2-66.1) |
| Median PFS from the response assessment (months, CI 95%) ‡ |                   |                  |
| PR                                                         | 14.2 (10.7-33.4)  | 18.1 (14.22-NA)  |
| SD                                                         | 9.7 (5.8-NA)      | 10.1 (8.2-21.7)  |
| PD                                                         | 1.0 (1.0-1.0)     | -                |
| Hazard ratio for PFS (CI 95%)                              |                   |                  |
| PR                                                         | 0.69 (0.29-1.61)  | 0.71 (0.31-1.66) |
| SD                                                         | Ref.              | Ref.             |
| PD                                                         | 2.55 (1.09-5.96)  | -                |
| Hazard ratio for OS (CI 95%)                               |                   |                  |
| PR                                                         | 0.86 (0.34-2.16)  | 0.80 (0.30-2.11) |
| SD                                                         | Ref.              | Ref.             |
| PD                                                         | 2.44 (0.99-5.97)  | 2.64 (1.46-4.78) |

Abbreviations: PFS= progression-free survival, RECIST= Response Evaluation Criteria In Solid Tumors; CI= confidence interval, PR= partial response, SD= stable disease, PD=progressive disease, Ref.= reference category, NA= not available. ‡ The median PFS from time zero is calculated by adding the time from start to the time of CTs for response assessment.

**Supplementary Table 3.** Cox PH regression for PFS and OS as per RECIST/Choi at 3 months (univariate analysis)

| <b>End point, PFS</b> | <b>HR (CI 95%)</b> | <b>P-value</b> |
|-----------------------|--------------------|----------------|
| Choi                  |                    |                |
| PR                    | 0.86 (0.39-1.89)   | 0.717          |
| SD                    | Ref.               | -              |
| PD                    | 2.89 (0.95-8.81)   | 0.060          |
| RECIST v1.1           |                    |                |
| PR                    | 0.61 (0.25-1.46)   | 0.273          |
| SD                    | Ref.               | -              |
| PD                    | -                  | -              |
| <b>End point, OS</b>  | <b>HR (CI 95%)</b> | <b>P-value</b> |
| Choi                  |                    |                |
| PR                    | 0.63 (0.31-1.31)   | 0.223          |
| SD                    | Ref.               | -              |
| PD                    | 1.28 (0.58-2.83)   | 0.529          |
| RECIST v1.1           |                    |                |
| PR                    | 1.26 (0.51-3.11)   | 0.611          |
| SD                    | Ref.               | -              |
| PD                    | 2.22 (1.13-4.25)   | 0.020          |

Abbreviations: Ref.= reference category, PR= partial response, SD= stable disease, PD= progressive disease, HR= hazard ratio.

**Supplementary Table 4.** Cox PH regression for PFS and OS evaluating the effect of TGR and AVR quantified at 3 and 6 months

| 3-month assessment |                          |         |                  |         |
|--------------------|--------------------------|---------|------------------|---------|
|                    | Univariate               |         | Multivariate     |         |
|                    | End point, PFS by RECIST |         |                  |         |
|                    | HR (CI 95%)              | P-value | HR (CI 95%)      | P-value |
| DVR                | 0.98 (0.96-0.99)         | 0.011   | -                | -       |
| TGR                | 0.99 (0.98-0.99)         | 0.005   | 0.99 (0.98-0.99) | 0.022   |
| AVR                | 0.98 (0.98-0.99)         | 0.030   | 0.99 (0.98-1.00) | 0.259   |
|                    | End point, OS            |         |                  |         |
|                    | HR (CI 95%)              | P-value | HR (CI 95%)      | P-value |
| DVR                | 0.98 (0.98-1.01)         | 0.865   | -                | -       |
| TGR                | 0.99 (0.99-1.01)         | 0.917   | 0.99 (0.98-1.01) | 0.820   |
| AVR                | 0.99 (0.98-1.01)         | 0.263   | 1.00 (0.99-1.00) | 0.255   |
| 6-month assessment |                          |         |                  |         |
|                    | End point, PFS by RECIST |         |                  |         |
|                    | HR (CI 95%)              | P-value | HR (CI 95%)      | P-value |
| DVR                | 0.87 (0.82-0.93)         | <0.001  | -                | -       |
| TGR                | 0.95 (0.93-0.97)         | <0.001  | 0.96 (0.94-0.98) | 0.001   |
| AVR                | 0.95 (0.92-0.98)         | 0.001   | 0.97 (0.94-1.01) | 0.204   |
|                    | End point, OS            |         |                  |         |
|                    | HR (CI 95%)              | P-value | HR (CI 95%)      | P-value |
| DVR                | 0.93 (0.87-0.98)         | 0.014   | -                | -       |
| TGR                | 0.97 (0.95-0.99)         | 0.007   | 0.97 (0.95-0.99) | 0.043   |
| AVR                | 0.96 (0.92-1.00)         | 0.079   | 0.98 (0.94-1.02) | 0.380   |

Abbreviations: HR= hazard ratio, AVR= attenuation variation rate, DVR= diameter variation rate, TGR= tumor growth rate, PFS= progression-free survival, OS= overall survival, CI= confidence interval.

## **Supplementary Table 5. Institutional ethics committees that have approved this study**

1 Hospital Universitario Central de Asturias

2 Hospital Universitario Morales Meseguer de Murcia

3 Hospital Universitario 12 de Octubre de Madrid

4 Hospital Universitario La Paz de Madrid

5 Hospital Universitario Ramón y Cajal de Madrid

6 Hospital Universitario Virgen del Rocío de Sevilla

7 Hospital Universitario Vall d'Hebron de Barcelona

8 Hospital Universitario Miguel Servet de Zaragoza

9 Hospital Universitario Marqués de Valdecilla de Santander

10 Complejo Hospitalario de Navarra de Pamplona

**Supplementary Figure 1. Spider plots with size and attenuation variation.** Abbreviations: mm= millimeters, HU= Hounsfield units. 4A: size variation by Choi criteria, 4B: attenuation variation by RECIST

**A**

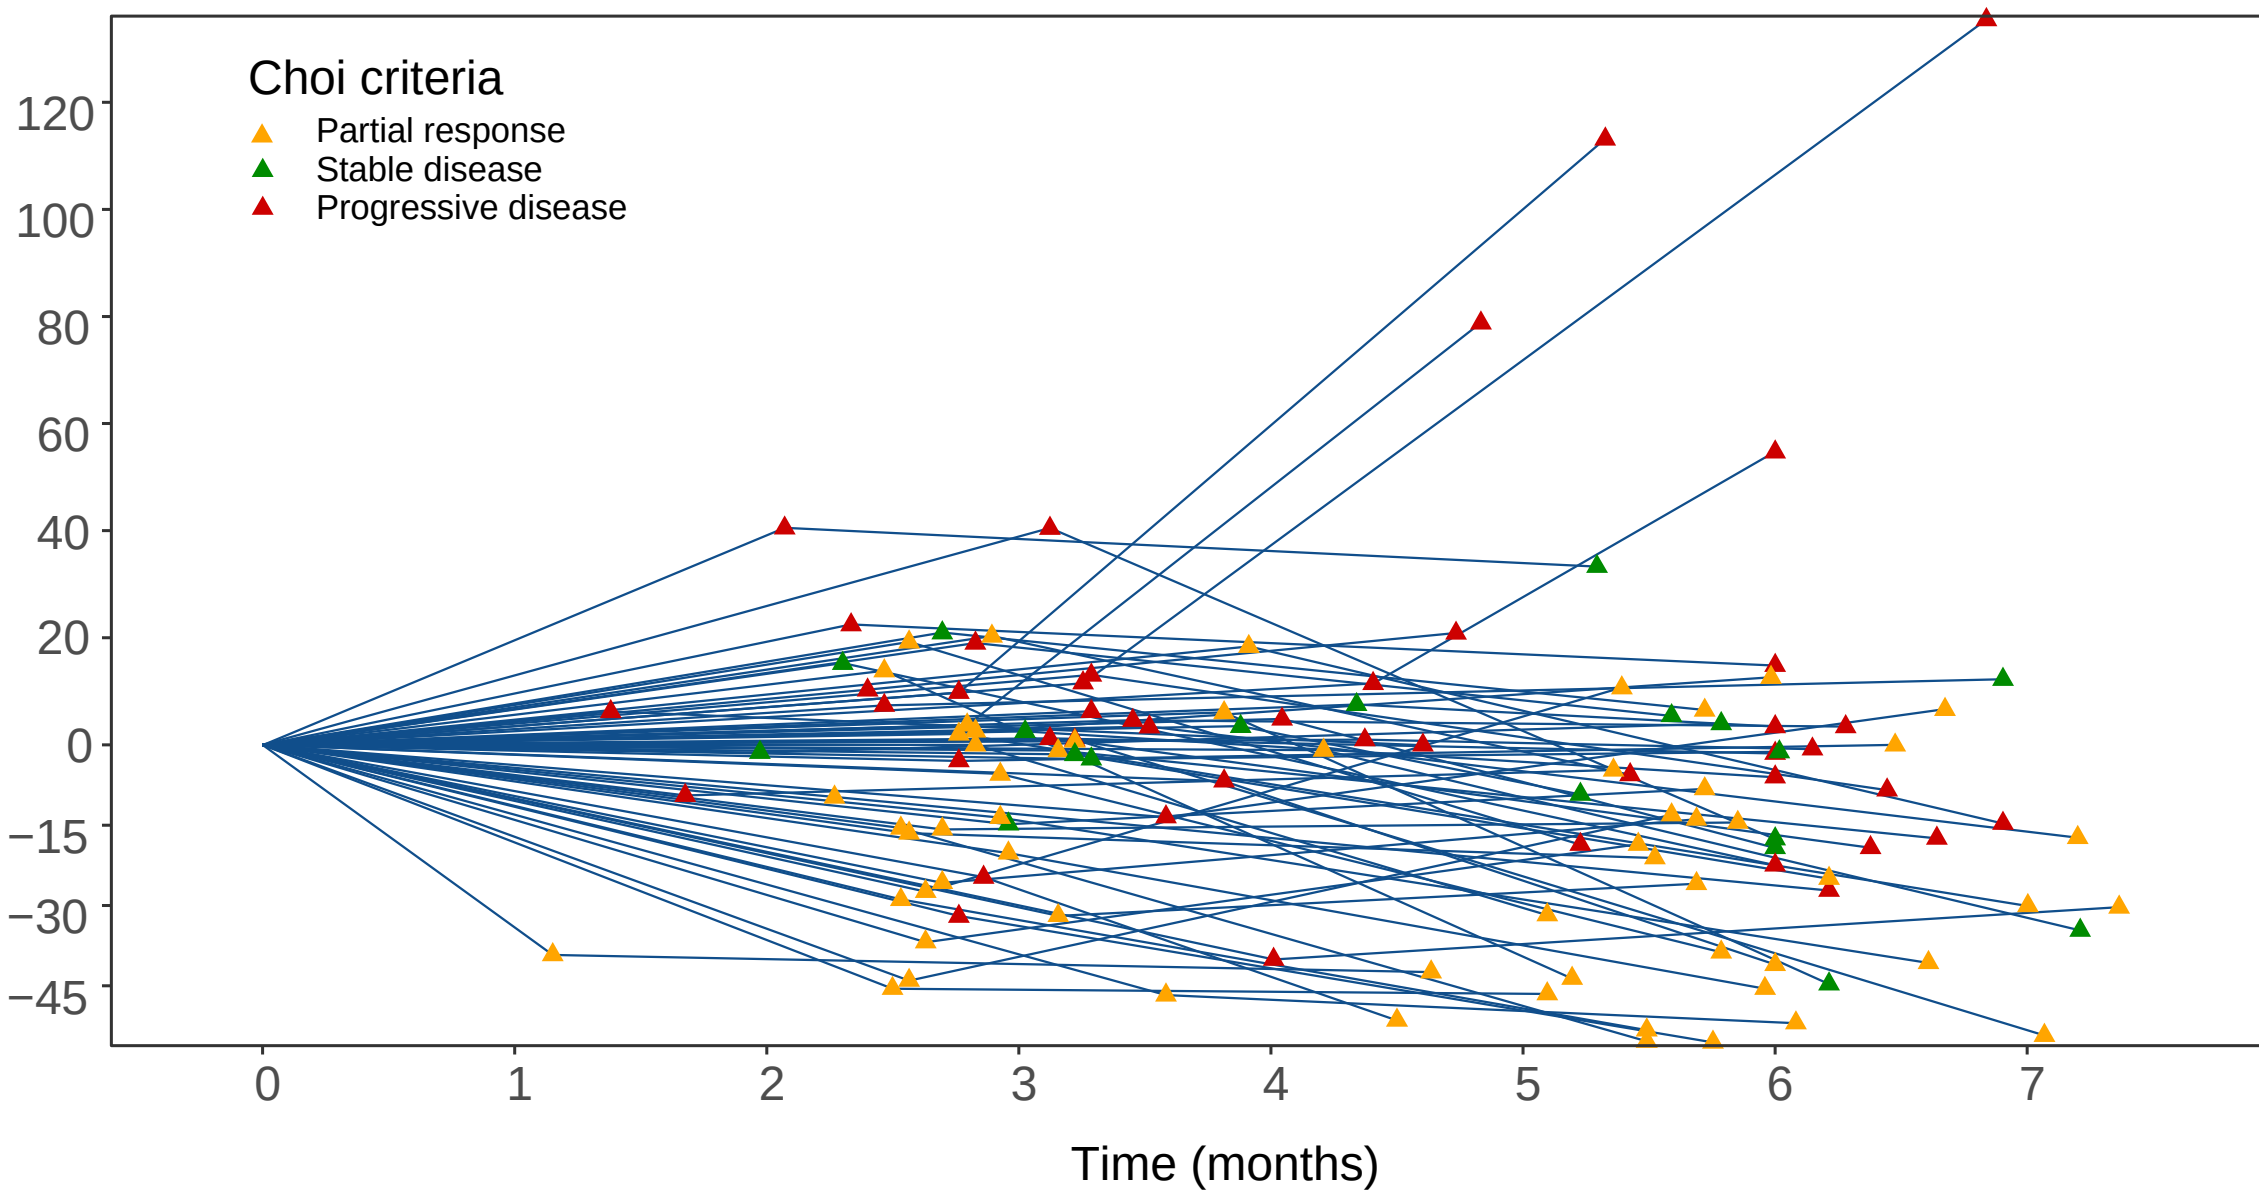

**B**

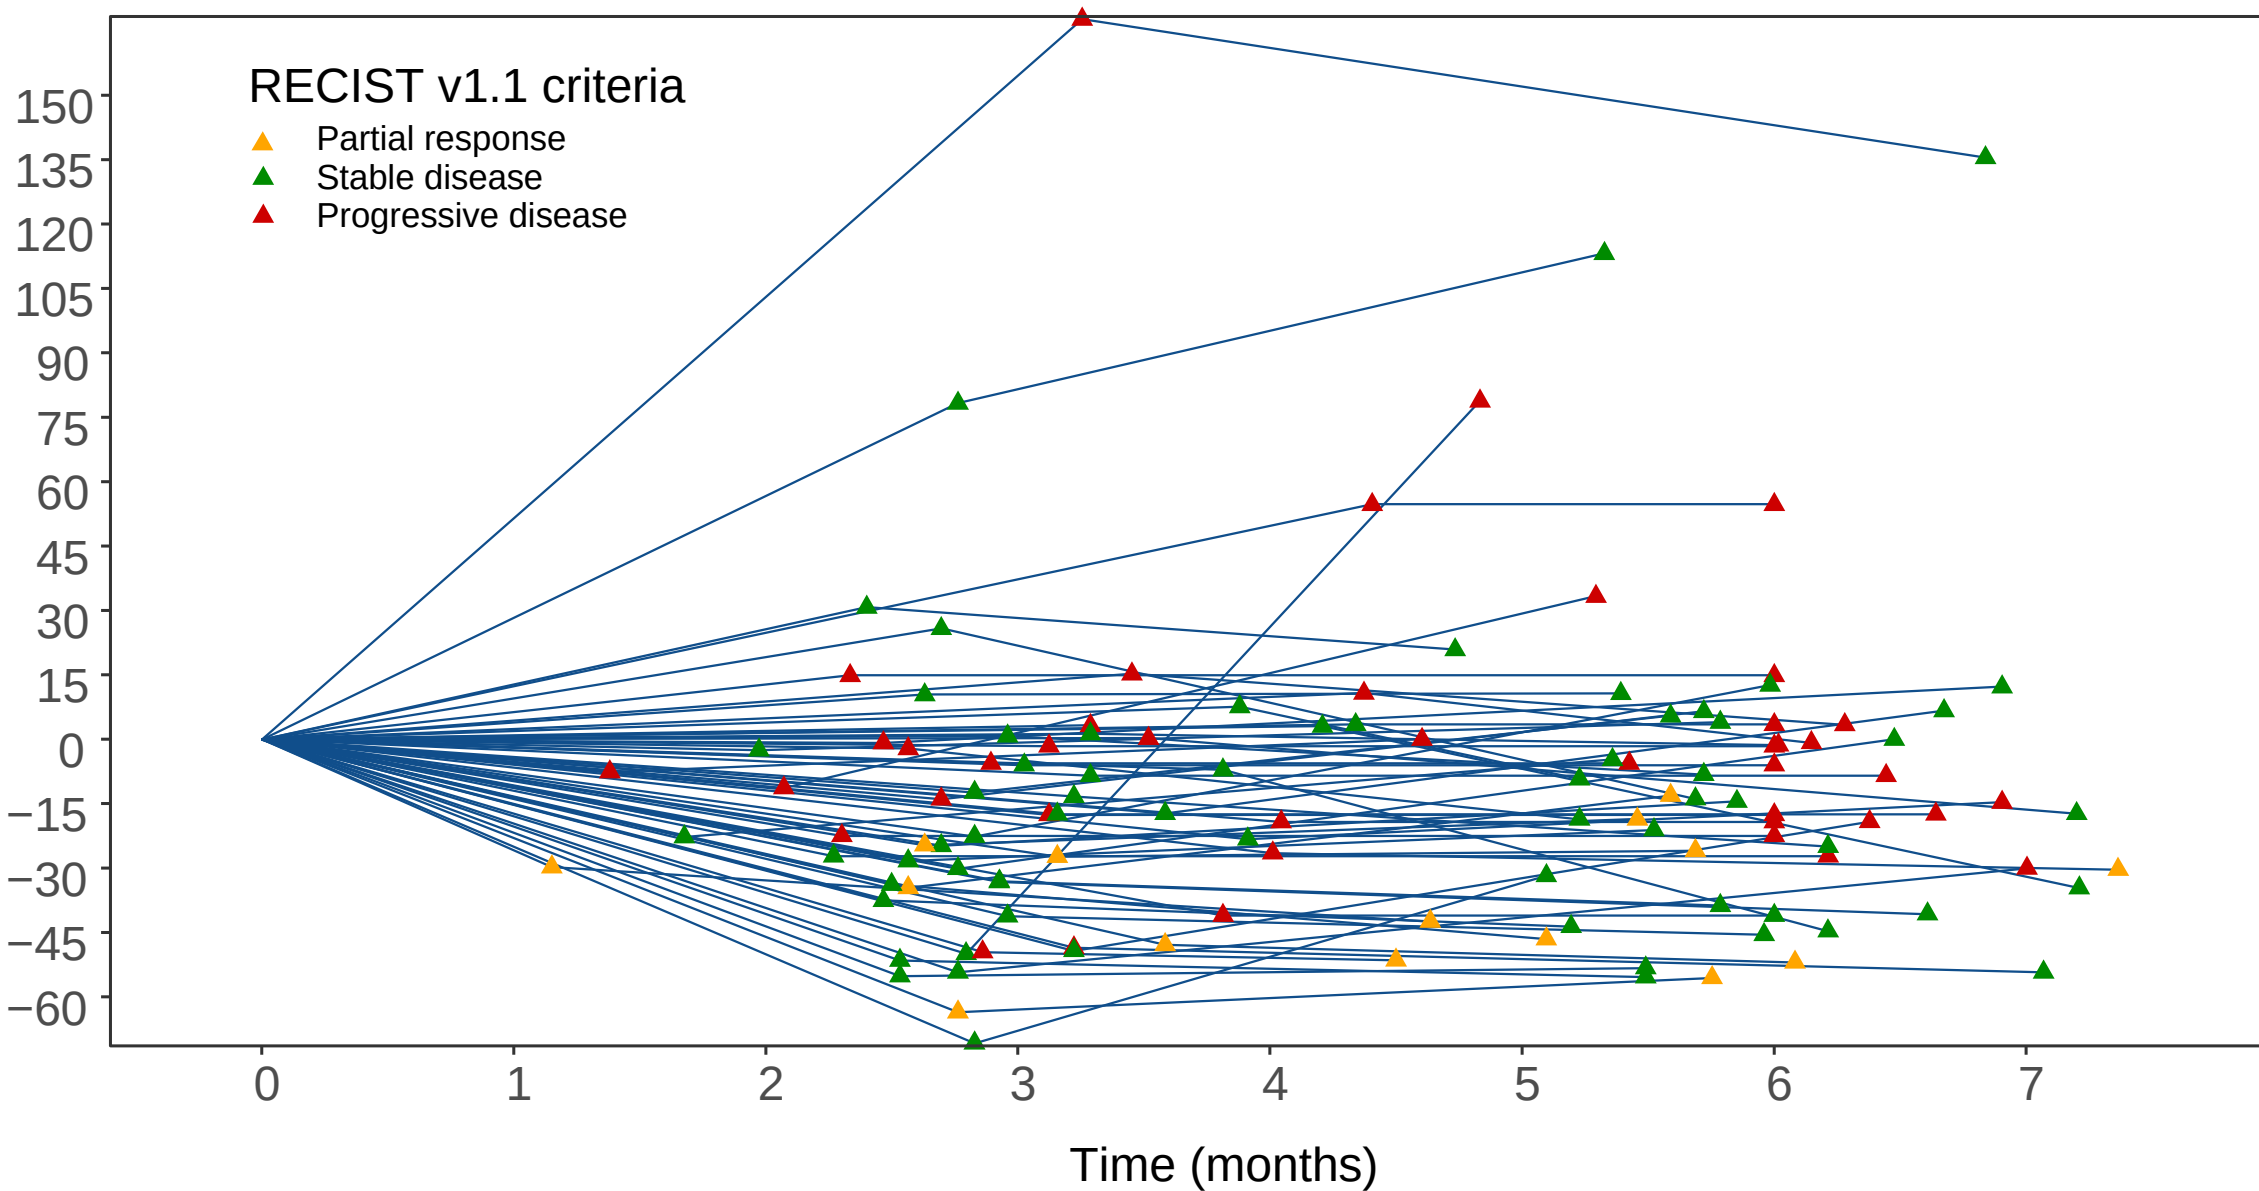

Supplement: 41416_2019_558_MOESM1_ESM.pdf [file 41416_2019_558_MOESM1_ESM.pdf]
